# Supplementary material for: Exploring the influence of natural cosolvents on the free energy and conformational landscape of filamentous actin and microtubules
Source: Royal Society of Chemistry journal article supplement (doi:10.1039/c8cp03041c), 2018-01-01
Supplement: c8cp03041c1.pdf [file c8cp03041c1.pdf]

## Supplementary Information

### Exploring the Influence of Natural Cosolvents on the Free Energy and Conformational Landscape of Filamentous Actin and Microtubules

Paul Hendrik Schummel, Michel W. Jaworek, Christopher Rosin, Jessica Högg and Roland Winter

#### Additional Figures

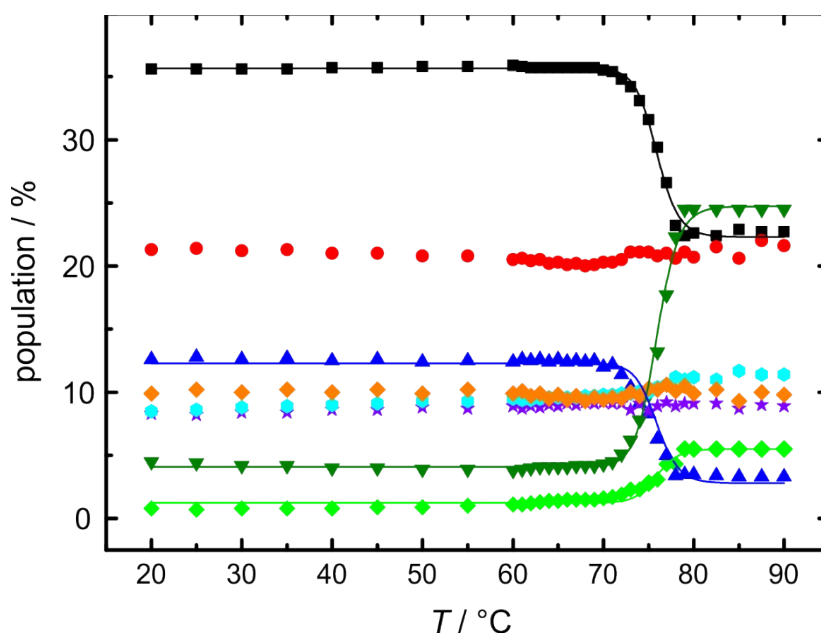

**Figure S1:** Representative temperature-dependent changes of secondary structure elements of F-actin in pure buffer solution at ambient pressure (■  $\alpha$ -helix ( $1655\text{ cm}^{-1}$ ), ▲ intramolecular  $\beta$ -sheets ( $1627\text{ cm}^{-1}$ ), ● intramolecular  $\beta$ -sheets ( $1636\text{ cm}^{-1}$ ) ▼ intermolecular  $\beta$ -sheets ( $1616\text{ cm}^{-1}$ ), ◆ intermolecular  $\beta$ -sheets ( $1684\text{ cm}^{-1}$ ), ◆ unordered structures ( $1642\text{ cm}^{-1}$ ), ★ loops ( $1676\text{ cm}^{-1}$ ), ○ loops ( $1666\text{ cm}^{-1}$ )).

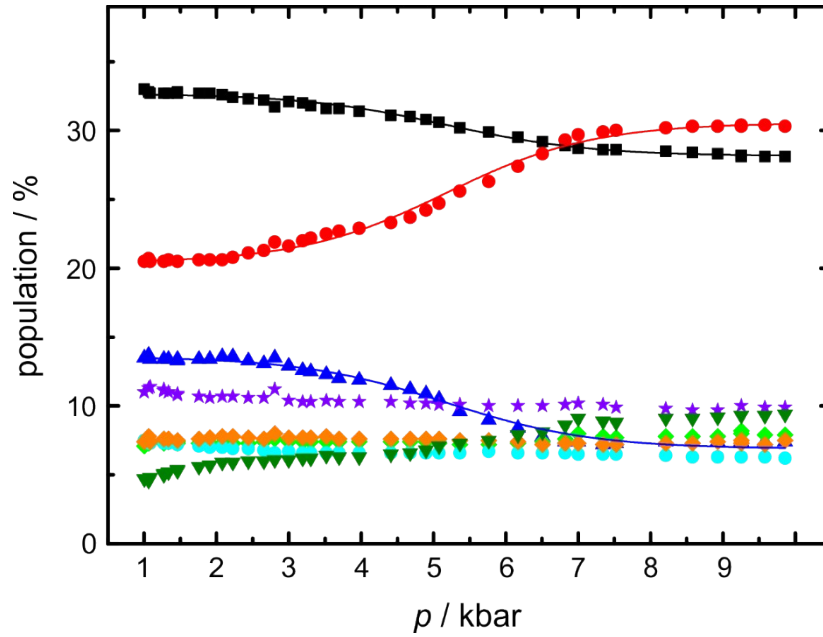

**Figure S2:** Representative pressure-dependent changes in secondary structure elements of F-actin in buffer solution, containing 2 M TMAO at 25 °C (■  $\alpha$ -helix (1655  $\text{cm}^{-1}$ ), ▲ intramolecular  $\beta$ -sheets (1627  $\text{cm}^{-1}$ ), ● intramolecular  $\beta$ -sheets (1636  $\text{cm}^{-1}$ ) ▼ intermolecular  $\beta$ -sheets (1616  $\text{cm}^{-1}$ ), ◆ intermolecular  $\beta$ -sheets (1684  $\text{cm}^{-1}$ ), ◇ unordered structures (1642  $\text{cm}^{-1}$ ), ★ loops (1676  $\text{cm}^{-1}$ ), ◐ loops (1666  $\text{cm}^{-1}$ )).

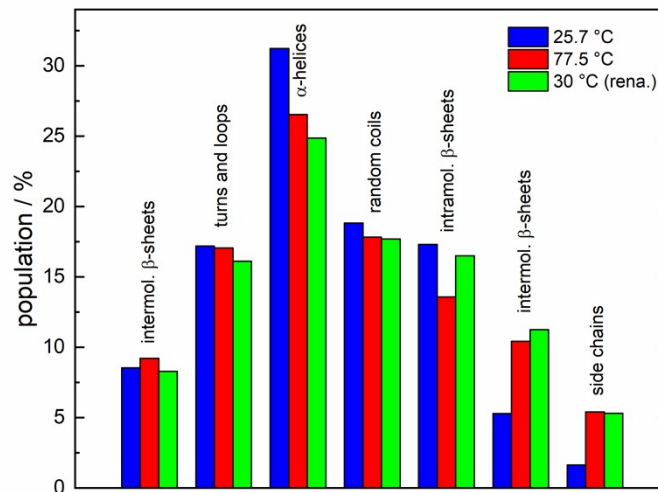

**Figure S3:** Temperature-dependent changes in secondary structure elements of microtubules in neat buffer solution at 25.7 °C, 77.5 °C and after cooling down again to 30 °C, revealing partial irreversibility of the thermal unfolding process.

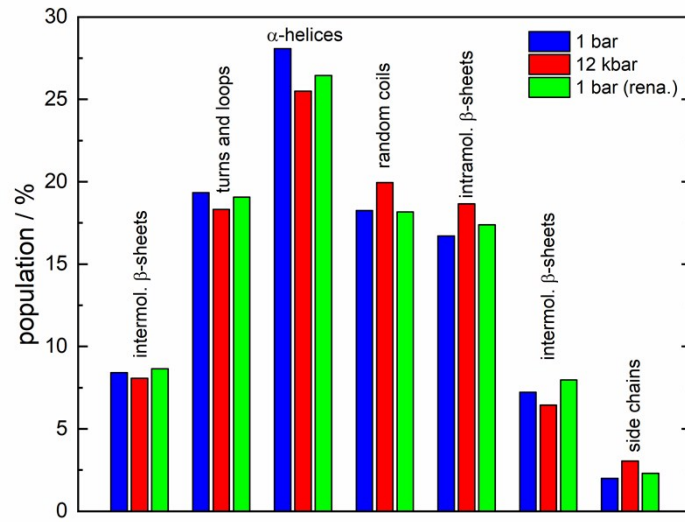

**Figure S4:** Pressure-dependent changes in secondary structure elements of microtubules in neat buffer solution at 1 bar, 12 kbar and after pressure release at 1 bar, revealing partial irreversibility of the unfolding process.
